# Supplementary material for: Incidence and Progression of Coronary Artery Calcium in South Asians Compared With 4 Race/Ethnic Groups
Source: PubMed Central journal article supplement — J Am Heart Assoc. 2019 Jan 11;8(2):e011053. doi: 10.1161/JAHA.118.011053 (PMC6497354; doi:10.1161/jaha.118.011053), 2019-01-11
Supplement: JAH3-8-e011053-s001.pdf [file JAH3-8-e011053-s001.pdf]

# **SUPPLEMENTAL MATERIAL**

**Table S1. Characteristics of the MASALA study and MESA participants at Exam 1, age 45-84 years.\***

|                                | South<br>Asians<br>n=623 | White<br>n=2,280      | African<br>American<br>n=1,558 | Latino<br>n=1,235     | Chinese<br>American<br>n=686 |
|--------------------------------|--------------------------|-----------------------|--------------------------------|-----------------------|------------------------------|
| Age, years                     | 56.7 ± 8.3               | 62.4 ± 10.2           | 61.7 ± 10.0                    | 61.0 ± 10.3           | 61.8 ± 10.2                  |
| Male sex                       | 353 (57)                 | 1103 (48)             | 696 (45)                       | 599 (48)              | 342 (50)                     |
| Current smoker                 | 20 (3)                   | 241 (11)              | 271 (18)                       | 163 (13)              | 38 (6)                       |
| Alcohol use ≥1 drink/day       | 223 (36%)                | 1459 (65)             | 776 (51)                       | 576 (47)              | 144 (21)                     |
| Exercise, MET-min/week         | 960<br>(330 - 1890)      | 1890<br>(909 - 3412)  | 1682<br>(690 - 3600)           | 1238<br>(435 - 2835)  | 1260<br>(630 - 2438)         |
| BMI, kg/m <sup>2</sup>         | 25.8 ± 3.9               | 27.6 ± 5.0            | 30.1 ± 5.8                     | 29.5 ± 5.1            | 24.1 ± 3.3                   |
| Waist circumference, cm        | 92.7 ± 10.1              | 97.7 ± 14.4           | 101.0 ± 14.6                   | 100.7 ± 13.1          | 87.2 ± 9.9                   |
| Systolic blood pressure, mmHg  | 125 ± 16                 | 123 ± 20              | 131 ± 21                       | 126 ± 21              | 124 ± 21                     |
| Diastolic blood pressure, mmHg | 73 ± 10                  | 70 ± 10               | 74 ± 10                        | 72 ± 10               | 72 ± 10                      |
| Hypertension**                 | 253 (41)                 | 855 (38)              | 901 (58)                       | 514 (42)              | 250 (36)                     |
| Diabetes†                      | 155 (25)                 | 133 (6)               | 262 (17)                       | 207 (17)              | 84 (12)                      |
| LDL-cholesterol, mmol/L        | 2.86 ± 0.84              | 3.03 ± 0.78           | 3.02 ± 0.84                    | 3.09 ± 0.83           | 2.97 ± 0.73                  |
| HDL-cholesterol, mmol/L        | 1.24<br>(1.03 - 1.47)    | 1.29<br>(1.06 - 1.58) | 1.29<br>(1.06 - 1.58)          | 1.16<br>(1.01 - 1.40) | 1.24<br>(1.03 - 1.45)        |
| Triglycerides, mmol/L          | 1.34<br>(0.99 - 1.79)    | 1.28<br>(0.88 - 1.84) | 1.01<br>(0.75 - 1.38)          | 1.51<br>(1.07 - 2.16) | 1.44<br>(0.98 - 1.98)        |
| Fasting glucose, mmol/L        | 5.75 ± 1.35              | 5.04 ± 1.14           | 5.50 ± 1.67                    | 5.70 ± 2.03           | 5.48 ± 1.57                  |
| Cholesterol medication use‡    | 172 (28)                 | 410 (18)              | 249 (16)                       | 182 (15)              | 105 (15)                     |
| CAC score                      |                          |                       |                                |                       |                              |
| zero                           | 346 (56)                 | 1002 (44)             | 908 (58)                       | 671 (54)              | 345 (50)                     |
| 1-100                          | 150 (24)                 | 570 (25)              | 372 (24)                       | 313 (25)              | 196 (29)                     |
| 101-400                        | 75 (12)                  | 374 (16)              | 146 (9)                        | 148 (12)              | 100 (15)                     |
| >400                           | 52 (8)                   | 314 (14)              | 117 (8)                        | 95 (8)                | 43 (6)                       |

\*values are presented as n (%), or mean ± SD, or median (interquartile range), as appropriate

\*\*hypertension was defined as systolic blood pressure ≥140 and/or diastolic blood pressure ≥90 and/or use of any anti-hypertension medication

†diabetes was defined as fasting glucose ≥126 mg/dl and/or use of an anti-diabetes medication
